# Supplementary material for: Green synthesis of a palladium–polyaniline nanocomposite for green Suzuki–Miyaura coupling reactions
Source: Royal Society of Chemistry journal article supplement (doi:10.1039/c5ra05007c), 2015-01-01
Supplement: c5ra05007c1.pdf [file c5ra05007c1.pdf]

*Electronic supplementary information*

**Green synthesis of a Palladium-Polyaniline nanocomposite for green Suzuki-Miyaura coupling reactions**

Sunil Dutt, Raj Kumar and Prem Felix Siril\*

School of Basic Sciences, Indian Institute of Technology Mandi -175 005, Himachal Pradesh,  
India

\*Corresponding author email: [prem@iitmandi.ac.in](mailto:prem@iitmandi.ac.in)

Tel. no: +91-1905207040 Fax: +91-1905237942

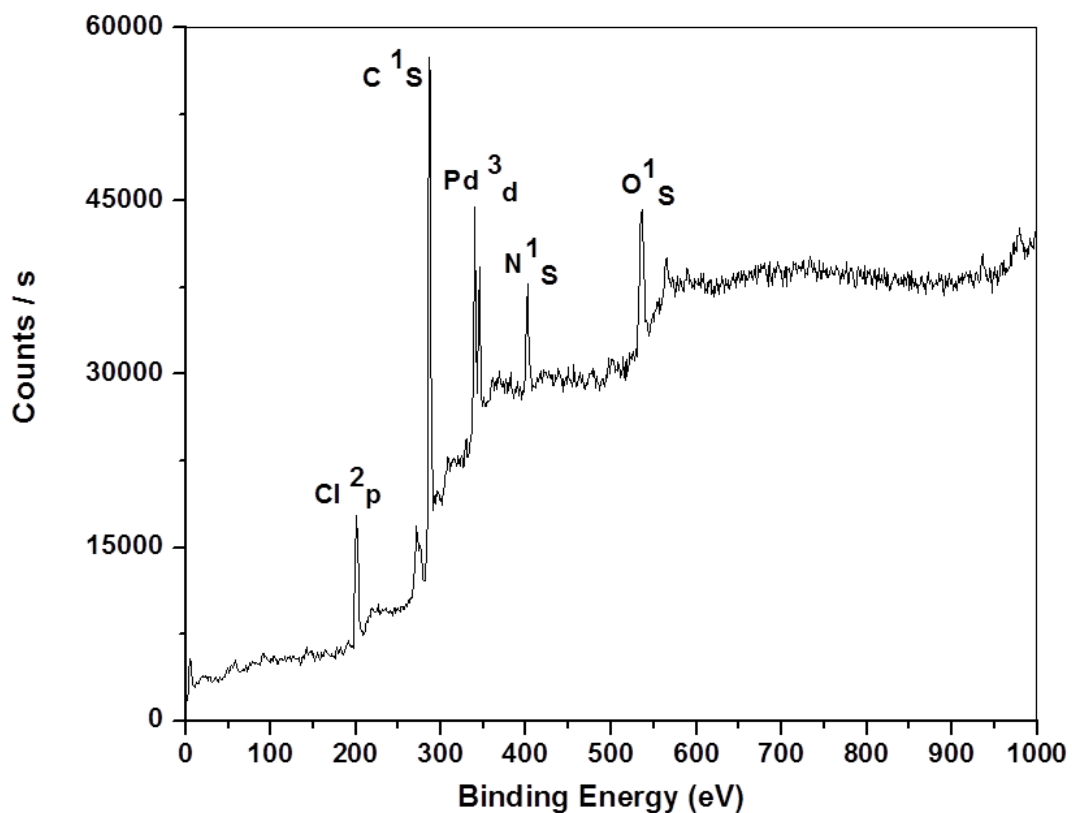

**Fig. S1** Overall XPS spectrum of the Pd-PANI nanocomposite

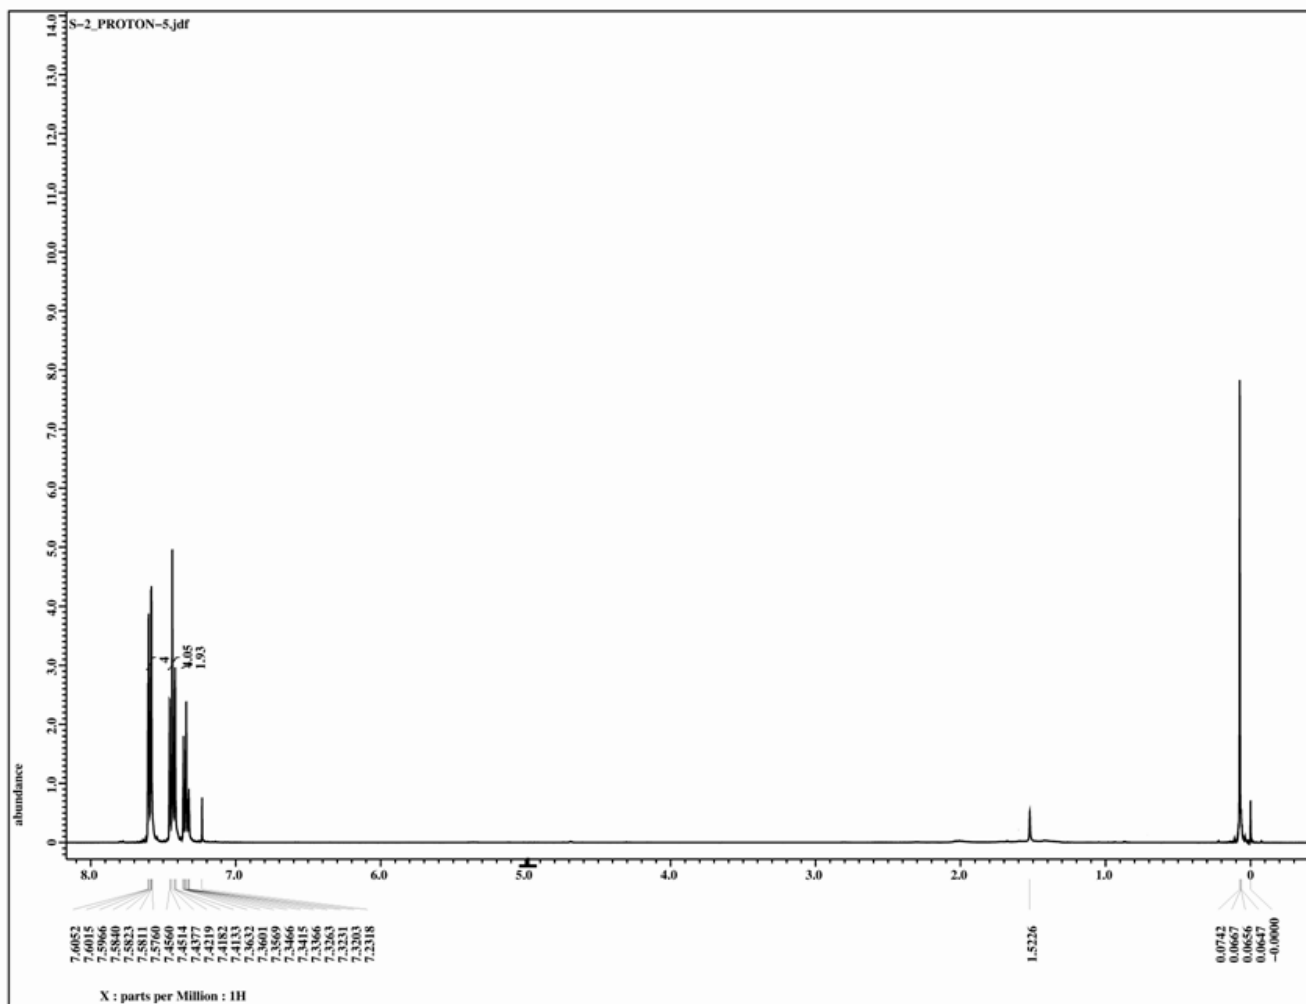

Fig. S2.  $^1\text{H}$ -NMR spectra of Biphenyl.

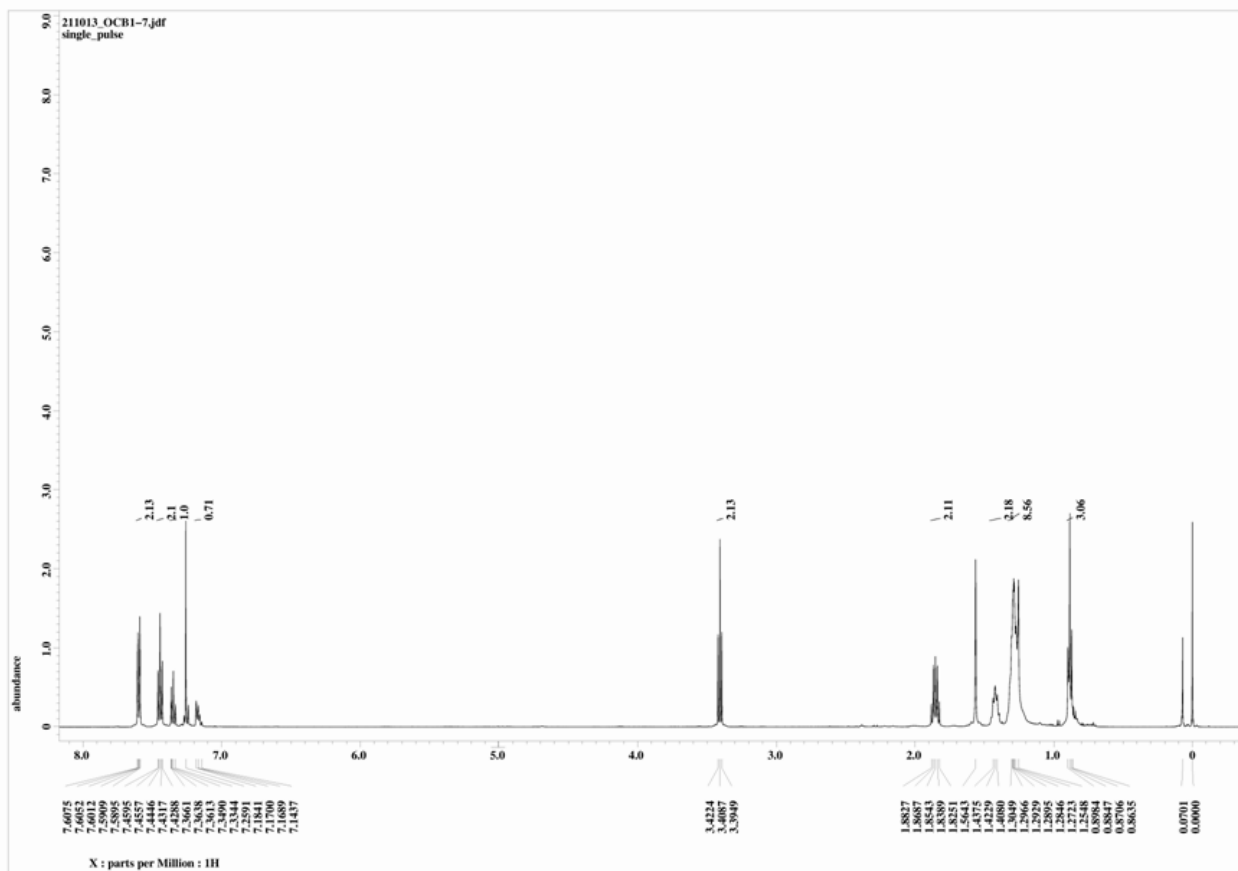

Fig. S3.  $^1\text{H}$ -NMR spectra of Octyl benzene.
